# Supplementary material for: Dietary Diversity and Dietary Patterns in School-Aged Children in Western Kenya: A Latent Class Analysis
Source: MDPI journal article supplement (doi:10.3390/ijerph19159130), 2022-07-26
Supplement: s1 [file s1]

**Dietary Diversity and Dietary Patterns in School-Aged Children  
in Western Kenya: A Latent Class Analysis**

Tiange Liu,<sup>1\*</sup> Sherryl Broverman,<sup>2,3</sup> Eve S. Puffer,<sup>3,4</sup> Daniel Zaltz,<sup>1</sup> Andrew L. Thorne-Lyman,<sup>5</sup>  
Sara E. Benjamin-Neelon.<sup>1,5</sup>

<sup>1</sup> Department of Health, Behavior and Society, Johns Hopkins Bloomberg School of Public Health, Baltimore, Maryland, 21205, USA

<sup>2</sup> Department of Biology, Duke University, Durham, North Carolina, 27708, USA

<sup>3</sup> Duke Global Health Institute, Duke University Medical Center, Durham, 27710, North Carolina, USA

<sup>4</sup> Department of Psychology and Neuroscience, Duke University, Durham, 27708, North Carolina, USA

<sup>5</sup> Center for Human Nutrition, Department of International Health, Johns Hopkins Bloomberg School of Public Health, Baltimore, Maryland, 21205, USA

**\* Corresponding author:**

Tiange Liu

615 N. Wolfe Street, Baltimore, Maryland 21205

email: [tliu57@jhu.edu](mailto:tliu57@jhu.edu)

## SUPPLEMENTARY MATERIALS

**Table S1.** Food groups and cut points for low, medium, and high consumption

| Food Group                                       | Consumption (g) |                  |                  |           |                 |                  |
|--------------------------------------------------|-----------------|------------------|------------------|-----------|-----------------|------------------|
|                                                  | Village A       |                  |                  | Village B |                 |                  |
|                                                  | Low             | Medium           | High             | Low       | Medium          | High             |
| 1) Grains, white roots and tubers, and plantains | ≤220.3          | >220.3 to ≤489.1 | >489.1           | ≤63.4     | >63.4 to ≤300.5 | >300.5           |
| 2) Pulses (beans, peas and lentils)              | 0.0             | >0.0             | N/A <sup>a</sup> | 0.0       | >0.0 to ≤28.0   | >28.0            |
| 3) Nuts and seeds                                | 0.0             | >0.0             | N/A <sup>a</sup> | 0.0       | >0.0            | N/A <sup>a</sup> |
| 4) Dairy                                         | 0.0             | >0.0 to ≤6.8     | >6.8             | 0.0       | >0.0            | N/A <sup>a</sup> |
| 5) Meat, poultry and fish                        | 0.0             | >0.0 to ≤79.4    | >79.4            | ≤10.6     | >10.6 to ≤87.2  | >87.2            |
| 6) Eggs                                          | 0.0             | >0.0             | N/A <sup>a</sup> | 0.0       | >0.0            | N/A <sup>a</sup> |
| 7) Dark green leafy vegetables                   | ≤10.1           | >10.01 to ≤102.1 | >102.1           | 0.0       | >0.0 to ≤51.1   | >51.1            |
| 8) Other Vitamin A-rich fruits and vegetables    | 0.0             | >0.0             | N/A <sup>a</sup> | 0.0       | >0.0            | N/A <sup>a</sup> |
| 9) Other vegetables                              | ≤6.7            | >6.7 to ≤25.3    | >25.3            | ≤1.47     | >1.47 to ≤11.1  | >11.1            |
| 10) Other fruits                                 | 0.0             | >0.0 to ≤175.0   | >175.0           | 0.0       | >0.0            | N/A <sup>a</sup> |

<sup>a</sup>Cut points for low, medium, and high consumption were at the 20<sup>th</sup> and 80<sup>th</sup> percentile of each food group, separately for children in village A and B. Some of the food groups had only two categories (0 vs. >0) because more than 75% of the children reported no intake of these food groups.

**Table S2.** Model-fit statistics for latent class analysis

|                                       | <b>Village A</b> |            | <b>Village B</b> |            |
|---------------------------------------|------------------|------------|------------------|------------|
|                                       | <b>BIC</b>       | <b>AIC</b> | <b>BIC</b>       | <b>AIC</b> |
| Latent classes (dietary patterns) = 2 | 10909.29         | 10947.29   | 12695.89         | 12730.89   |
| Latent classes (dietary patterns) = 3 | 10796.32         | 10856.32   | 12670.90         | 12725.90   |
| Latent classes (dietary patterns) = 4 | 10789.43         | 10871.43   | 12667.80         | 12742.80   |
| Latent classes (dietary patterns) = 5 | 10814.55         | 10918.55   | 12808.40         | 12903.40   |
| Latent classes (dietary patterns) = 6 | 10926.30         | 11052.30   | 13040.49         | 13155.49   |
| Latent classes (dietary patterns) = 7 | 11221.56         | 11369.56   | 13342.53         | 13477.53   |
